# Supplementary material for: 2013–2014 Survey of Chars Using Raman Spectroscopy
Source: MDPI journal article supplement (doi:10.3390/c7030063), 2021-08-19
Supplement: s1 [file s1]

Supplementary material: Table S1 for “2013-2014 Survey of Chars Using Raman Spectroscopy”

| Name                               | D band position | 99% confidence interval $\pm$ | G band position | 99% confidence interval $\pm$ |
|------------------------------------|-----------------|-------------------------------|-----------------|-------------------------------|
| Leucan metal kiln                  | 1307.2          | 2.5                           | 1596.8          | 1.3                           |
| Fluidyne gasifier                  | 1306.2          | 2.1                           | 1595.4          | 1.5                           |
| Cone kiln (TFOD)                   | 1307.6          | 6.9                           | 1595.2          | 3.3                           |
| Massey open source (Run 5)         | 1315.6          | 4.7                           | 1594.4          | 2.4                           |
| COST I                             | 1316.8          | 4.5                           | 1593.4          | 2.5                           |
| Stardust Continuous                | 1323.8          | 14.1                          | 1592.8          | 5.9                           |
| Rice husk char                     | 1304.2          | 10.9                          | 1592            | 3.8                           |
| Domestic log fire (water quenched) | 1323.2          | 7.3                           | 1591.6          | 2.5                           |
| Mixed sawdust Kiln                 | 1315.2          | 7.5                           | 1590.2          | 3.4                           |
| Anthracite coal                    | 1324.2          | 3.8                           | 1588.4          | 1.7                           |
| Yealand's Estate Batch             | 1317.6          | 10.6                          | 1585.8          | 7.2                           |
| Tire pyrolysis carbon              | 1329.8          | 11.2                          | 1583.4          | 10.5                          |
| Domestic log fire (air cooled)     | 1318.8          | 8.0                           | 1583.2          | 6.9                           |
| Giant reed                         | 1326            | 13.9                          | 1581.6          | 11.0                          |
| TLUD top middle                    | 1331.8          | 6.3                           | 1581.4          | 3.9                           |
| Flash corn bottom                  | 1328.4          | 8.2                           | 1580.4          | 2.7                           |
| Flash oak middle                   | 1329            | 7.1                           | 1579.4          | 8.6                           |
| Ancient oak                        | 1331.6          | 17.0                          | 1578.4          | 11.2                          |
| COST II                            | 1341.6          | 3.3                           | 1574.4          | 5.1                           |
| Tasmanian blackwood                | 1332            | 18.3                          | 1574.2          | 6.6                           |
| Coconut shell char                 | 1322.8          | 11.4                          | 1572.8          | 9.8                           |
| UC fast Pyrolysis                  | 1334            | 7.2                           | 1572.2          | 4.8                           |
| COST III                           | 1334.4          | 10.1                          | 1572            | 9.4                           |
| BSe-550                            | 1326.8          | 10.3                          | 1569.6          | 2.7                           |
| BSe-550 HF                         | 1327.4          | 10.5                          | 1569.4          | 1.9                           |
| MAe-450                            | 1332.6          | 8.7                           | 1566            | 3.2                           |
| Flash oak bottom                   | 1324            | 13.5                          | 1563.6          | 38.7                          |
| MAe-450 HF                         | 1323.2          | 5.6                           | 1561.8          | 5.7                           |
| UC slow Pyrolysis                  | 1309.8          | 7.8                           | 1529.6          | 42.5                          |
| BSe-450                            | 1310.8          | 5.3                           | 1522.8          | 17.7                          |
| BSe-450 HF                         | 1312.2          | 3.0                           | 1513.6          | 11.3                          |
| BSe-350 HF                         | 1309.6          | 0.6                           | 1509            | 7.1                           |
| Yealand's Estate Auger             | 1311.8          | 18.8                          | 1507.8          | 7.2                           |
| BSe-350                            | 1304.4          | 3.4                           | 1507.4          | 3.8                           |
| MAe-350                            | 1303.6          | 8.5                           | 1506.6          | 10.5                          |
| Rotomahana tephra                  | 1310            | 2.0                           | 1504.6          | 6.6                           |
| Palm empty fruit bunch             | 1300            | 8.3                           | 1502.8          | 3.4                           |
| MAe-350 HF                         | 1303.8          | 16.5                          | 1502.4          | 3.3                           |
| BSe-250                            | 1307.2          | 7.4                           | 1502.2          | 4.0                           |
| Noname beach (Australian tephra)   | 1306.4          | 3.1                           | 1501.4          | 1.5                           |
| BSe-250 HF                         | 1306.4          | 4.4                           | 1500.6          | 1.5                           |
| MAe-250                            | 1294.6          | 5.1                           | 1500.2          | 0.5                           |
| MAe-250 HF                         | 1291.8          | 1.5                           | 1500            |                               |

Supplementary material: Table S1 for “2013-2014 Survey of Chars Using Raman Spectroscopy”

| Name                               | D band / G band height ratio | 99% confidence interval $\pm$ | Valley / G band height ratio | 99% confidence interval $\pm$ |
|------------------------------------|------------------------------|-------------------------------|------------------------------|-------------------------------|
| Leucan metal kiln                  | 1.21                         | 0.08                          | 0.41                         | 0.03                          |
| Fluidyne gasifier                  | 1.32                         | 0.08                          | 0.46                         | 0.03                          |
| Cone kiln (TFOD)                   | 1.14                         | 0.04                          | 0.41                         | 0.01                          |
| Massey open source (Run 5)         | 1.07                         | 0.02                          | 0.40                         | 0.02                          |
| COST I                             | 1.10                         | 0.02                          | 0.52                         | 0.02                          |
| Stardust Continuous                | 1.16                         | 0.07                          | 0.52                         | 0.07                          |
| Rice husk char                     | 1.25                         | 0.05                          | 0.52                         | 0.10                          |
| Domestic log fire (water quenched) | 1.13                         | 0.04                          | 0.54                         | 0.03                          |
| Mixed sawdust Kiln                 | 1.09                         | 0.11                          | 0.51                         | 0.12                          |
| Anthracite coal                    | 0.93                         | 0.03                          | 0.52                         | 0.10                          |
| Yealand's Estate Batch             | 1.16                         | 0.09                          | 0.64                         | 0.13                          |
| Tire pyrolysis carbon              | 1.01                         | 0.06                          | 0.71                         | 0.08                          |
| Domestic log fire (air cooled)     | 1.10                         | 0.08                          | 0.64                         | 0.04                          |
| Giant reed                         | 1.05                         | 0.08                          | 0.66                         | 0.17                          |
| TLUD top middle                    | 0.99                         | 0.04                          | 0.57                         | 0.05                          |
| Flash corn bottom                  | 1.01                         | 0.02                          | 0.58                         | 0.04                          |
| Flash oak middle                   | 1.06                         | 0.18                          | 0.67                         | 0.10                          |
| Ancient oak                        | 0.98                         | 0.08                          | 0.80                         | 0.13                          |
| COST II                            | 1.04                         | 0.02                          | 0.74                         | 0.08                          |
| Tasmanian blackwood                | 0.96                         | 0.04                          | 0.74                         | 0.06                          |
| Coconut shell char                 | 1.07                         | 0.04                          | 0.80                         | 0.15                          |
| UC fast Pyrolysis                  | 0.96                         | 0.03                          | 0.74                         | 0.02                          |
| COST III                           | 1.12                         | 0.03                          | 0.87                         | 0.06                          |
| BSe-550                            | 0.98                         | 0.02                          | 0.85                         | 0.03                          |
| BSe-550 HF                         | 0.98                         | 0.01                          | 0.81                         | 0.01                          |
| MAe-450                            | 0.94                         | 0.03                          | 0.88                         | 0.04                          |
| Flash oak bottom                   | 0.92                         | 0.12                          | 0.76                         | 0.14                          |
| MAe-450 HF                         | 0.93                         | 0.01                          | 0.90                         | 0.02                          |
| UC slow Pyrolysis                  | 0.84                         | 0.10                          | 0.91                         | 0.12                          |
| BSe-450                            | 0.91                         | 0.04                          | 0.96                         | 0.02                          |
| BSe-450 HF                         | 0.90                         | 0.02                          | 0.95                         | 0.01                          |
| BSe-350 HF                         | 0.78                         | 0.03                          | 0.98                         | 0.02                          |
| Yealand's Estate Auger             | 0.76                         | 0.09                          | 0.99                         | 0.01                          |
| BSe-350                            | 0.83                         | 0.01                          | 0.99                         | 0.01                          |
| MAe-350                            | 0.77                         | 0.04                          | 0.99                         | 0.01                          |
| Rotomahana tephra                  | 0.66                         | 0.17                          | 0.99                         | 0.02                          |
| Palm empty fruit bunch             | 0.80                         | 0.04                          | 0.99                         | 0.01                          |
| MAe-350 HF                         | 0.78                         | 0.03                          | 0.99                         | 0.01                          |
| BSe-250                            | 0.82                         | 0.01                          | 0.997                        | 0.003                         |
| Noname beach (Australian tephra)   | 0.87                         | 0.01                          | 0.999                        | 0.001                         |
| BSe-250 HF                         | 0.80                         | 0.02                          | 0.999                        | 0.002                         |
| MAe 250                            | 0.86                         | 0.01                          | 1.000                        | 0.001                         |
| MAe 250 HF                         | 0.79                         | 0.04                          | 1.000                        |                               |

Supplementary material: Table S1 for “2013-2014 Survey of Chars Using Raman Spectroscopy”

| Name                               | A band / G band<br>height ratio | 99%<br>confidence<br>interval $\pm$ | photoluminescence<br>slope/G band<br>height ratio ( $\mu\text{m}$ ) | 99%<br>confidence<br>interval $\pm$ |
|------------------------------------|---------------------------------|-------------------------------------|---------------------------------------------------------------------|-------------------------------------|
| Leucan metal kiln                  | 0.63                            | 0.01                                | -0.8                                                                | 0.2                                 |
| Fluidyne gasifier                  | 0.63                            | 0.04                                | 0.7                                                                 | 0.6                                 |
| Cone kiln (TFOD)                   | 0.58                            | 0.02                                | -1.3                                                                | 0.6                                 |
| Massey open source (Run 5)         | 0.59                            | 0.02                                | 0.1                                                                 | 0.5                                 |
| COST I                             | 0.72                            | 0.02                                | 1.0                                                                 | 1.3                                 |
| Stardust Continuous                | 0.78                            | 0.09                                | 7.8                                                                 | 4.4                                 |
| Rice husk char                     | 0.72                            | 0.10                                | -2.5                                                                | 4.9                                 |
| Domestic log fire (water quenched) | 0.76                            | 0.02                                | 0.4                                                                 | 0.1                                 |
| Mixed sawdust Kiln                 | 0.66                            | 0.13                                | 6.0                                                                 | 5.6                                 |
| Anthracite coal                    | 0.74                            | 0.17                                | 24.9                                                                | 11.0                                |
| Yealand's Estate Batch             | 0.86                            | 0.14                                | 2.5                                                                 | 2.1                                 |
| Tire pyrolysis carbon              | 0.93                            | 0.12                                | 13.6                                                                | 14.7                                |
| Domestic log fire (air cooled)     | 0.83                            | 0.04                                | 3.5                                                                 | 4.6                                 |
| Giant reed                         | 0.83                            | 0.14                                | 5.8                                                                 | 10.4                                |
| TLUD top middle                    | 0.75                            | 0.04                                | 7.0                                                                 | 3.7                                 |
| Flash corn bottom                  | 0.75                            | 0.03                                | 4.5                                                                 | 1.0                                 |
| Flash oak middle                   | 0.85                            | 0.10                                | 10.2                                                                | 4.9                                 |
| Ancient oak                        | 1.38                            | 0.27                                | 124.3                                                               | 48.7                                |
| COST II                            | 0.92                            | 0.10                                | 13.2                                                                | 6.0                                 |
| Tasmanian blackwood                | 0.89                            | 0.07                                | 10.0                                                                | 2.7                                 |
| Coconut shell char                 | 0.99                            | 0.17                                | 15.4                                                                | 11.2                                |
| UC fast Pyrolysis                  | 0.90                            | 0.02                                | 15.1                                                                | 1.0                                 |
| COST III                           | 1.01                            | 0.04                                | 8.1                                                                 | 4.8                                 |
| BSe-550                            | 0.99                            | 0.04                                | 15.9                                                                | 3.0                                 |
| BSe-550 HF                         | 0.95                            | 0.01                                | 14.9                                                                | 1.0                                 |
| MAe-450                            | 1.02                            | 0.05                                | 22.2                                                                | 1.7                                 |
| Flash oak bottom                   | 0.91                            | 0.15                                | 17.0                                                                | 15.6                                |
| MAe-450 HF                         | 1.04                            | 0.01                                | 24.6                                                                | 0.4                                 |
| UC slow Pyrolysis                  | 1.15                            | 0.15                                | 49.0                                                                | 22.9                                |
| BSe-450                            | 1.11                            | 0.04                                | 24.7                                                                | 1.2                                 |
| BSe-450 HF                         | 1.08                            | 0.01                                | 30.8                                                                | 2.1                                 |
| BSe-350 HF                         | 1.12                            | 0.04                                | 47.6                                                                | 1.9                                 |
| Yealand's Estate Auger             | 1.18                            | 0.03                                | 52.1                                                                | 14.6                                |
| BSe-350                            | 1.14                            | 0.01                                | 32.8                                                                | 5.3                                 |
| MAe-350                            | 1.21                            | 0.05                                | 56.4                                                                | 12.8                                |
| Rotomahana tephra                  | 1.72                            | 0.19                                | 187.5                                                               | 48.4                                |
| Palm empty fruit bunch             | 1.19                            | 0.04                                | 46.1                                                                | 4.3                                 |
| MAe-350 HF                         | 1.16                            | 0.02                                | 49.3                                                                | 2.3                                 |
| BSe-250                            | 1.20                            | 0.02                                | 31.4                                                                | 3.1                                 |
| Noname beach (Australian tephra)   | 1.182                           | 0.004                               | 23.0                                                                | 7.8                                 |
| BSe-250 HF                         | 1.21                            | 0.01                                | 24.5                                                                | 7.7                                 |
| MAe-250                            | 1.20                            | 0.01                                | 19.0                                                                | 4.4                                 |
| MAe-250 HF                         | 1.23                            | 0.03                                | 28.0                                                                | 7.1                                 |
